# Supplementary material
Source: publisher site journal article supplement (https://www.dovepress.com/article/526660)
Supplement: Supplementary file 1 [file Supplementry%20file%20%252528Table%20S1%252529.docx]

**Table S1. Summary of Key Laboratory Test Results and Interpretation**

| Test Category | Parameter | Result | Reference Range | Interpretation |
| --- | --- | --- | --- | --- |
| Hematology | White blood cells (WBC) | 11.36 × 10⁹/L | 4.0 – 10.0 × 10⁹/L | Leukocytosis |
|  | Neutrophils | 10.43 × 10⁹/L | 2.0 – 7.0 × 10⁹/L | Neutrophilia |
|  | Lymphocytes | 2.14 × 10⁹/L | 1.0 – 4.0 × 10⁹/L | Normal |
|  | Hemoglobin | 130 g/L | 135 – 175 g/L (male) | Mild anemia |
|  | Platelets | 56 × 10⁹/L | 150 – 400 × 10⁹/L | Thrombocytopenia |
| Inflammatory Markers | C-reactive protein (CRP) | 154.55 mg/L | < 3 mg/L | Markedly elevated |
|  | Procalcitonin | 2.78 ng/mL | < 0.05 ng/mL | Significantly elevated |
| Coagulation Profile | Prothrombin time (PT) | 15.9 seconds | 11 – 13.5 seconds | Prolonged |
|  | Fibrinogen | 7.15 g/L | 2.0 – 4.0 g/L | Hyperfibrinogenemia |
|  | D-dimer | 9.66 mg/L | < 0.5 mg/L | Highly elevated (suggests DIC) |
| Biochemistry | Glucose (admission) | 17.9 mmol/L | 3.9 – 6.1 mmol/L | Severe hyperglycemia |
|  | Alanine Aminotransferase (ALT) | 170 U/L | < 55 U/L | Elevated |
|  | Aspartate Aminotransferase (AST) | 8020 U/L | < 40 U/L | Markedly elevated |
|  | Urea | 11.4 mmol/L | 2.5 – 7.1 mmol/L | Elevated |
|  | Creatinine | 110 μmol/L | 62 – 115 μmol/L | Borderline elevated |
| Cardiac Markers | CK-MB | 82 U/L | < 25 U/L | Elevated |
|  | Troponin I | 0.11 ng/mL | < 0.04 ng/mL | Elevated (suggests myocardial injury) |
| Temperature | Body temperature (max) | 39.5°C | 36.5 – 37.5°C | High fever |
| Bone Marrow Analysis | Marrow cellularity | Hypercellular | – | Active hematopoiesis |
|  | Lymphocyte proportion | 95.63% | – | Marked lymphocytic infiltration |
|  | Immunophenotype | CD5+, CD20+, CD200+, CD23+ (partial), Lambda+ | – | Consistent with CLL/SLL |
|  | Granulocytic and erythroid series | Suppressed | – | Inhibited granulopoiesis and reduced erythropoiesis |
|  | Megakaryocytes | Present | – | Scattered platelet-producing cells |
